# Supplementary material for: Guiding the Differentiation Direction of Pancreatic Islet-Derived Stem Cells by Glycated Collagen
Source: Hindawi journal article supplement (doi:10.1155/2018/6143081), 2018-07-03
Supplement: f2 [file 6143081.f2.pdf]

**Supplementary Table 2.** Sequence of Gene-Specific Primers Used in Real-Time PCR

| <b>Gene<br/>(Acc. No.)</b>         | <b>Full Name</b>                                   | <b>Forward Primer</b>           | <b>Reverse Primer</b>             |
|------------------------------------|----------------------------------------------------|---------------------------------|-----------------------------------|
| TLR2<br>(NM_198769.2)              | toll-like receptor 2                               | GTACGCAGTGAGTGGTGCAAGT          | GGCCGCGTCATTGTTCTC                |
| TLR4<br>(NM_019178.1)              | toll-like receptor 4                               | AATCCCTGCATAGAGGTACTTCCT<br>AAT | CTCAGATCTAGGTTCTTGTTGAA<br>TAAG   |
| NF- $\kappa$ B<br>(NM_001276711.1) | nuclear factor<br>kappa B                          | AGAGAAGCACAGATACCACTAAG         | CAGCCTCATAGAAGCCATCC              |
| HO1<br>(NM_012580.2)               | heme oxygenase-1                                   | GGTGTCAGGGAAGGCTTTAAG           | GTGCAGCTCCTCAGGGAAGTAG            |
| RAGE<br>(NM_053336.2)              | receptor for<br>advanced glycation<br>end-products | CTACCTATTCTGCAGCTTC             | CTGATGTTGACAGGAGGGCTTTC<br>C      |
| NOD2<br>(NM_001106172.1)           | nucleotide<br>oligomerization<br>domain 2          | TTCTGCCTTACGAGGGTTACTCTC<br>T   | ATGGTCCTCAGCTTAGCAGTGAA<br>C      |
| Ins1<br>(NM_019129.3)              | insulin 1                                          | GACCTTGGCACTGGAGGTT             | CCAGTTGGTAGAGGGAGCAG              |
| Ins2<br>(NM_019130.2)              | insulin 2                                          | CGAAGTGGAGGACCCACA              | TGCTGGTGCAGCACTGAT                |
| Pdx1<br>(NM_022852.3)              | pancreatic and<br>duodenal<br>homeobox 1           | CGTAGTAGCGGGACAACGA             | CTCCTCGCCCAGGTTAC                 |
| Glut2<br>(NM_012879.2)             | glucose transporter<br>type 2                      | TAGAGCAGCTCTTTATTCCAGATT<br>T   | TTACTCTCCATTTTCAGTCCTTTGT         |
| Pax4<br>(NM_031799.1)              | paired box 4                                       | GAAGCTTATGCAGCAGGACGGTC<br>TC   | CGGATCCTTATGGCCAGTGTAAG<br>TAATAG |
| Gcg<br>(NM_012707.2)               | glucagon                                           | GGTGAAAGGCCGAGGAAG              | GAGAAGGATCCATCAGCATGT             |
| PPy<br>(NM_012626.2)               | pancreatic<br>polypeptide                          | ACTCGCTCAGGACACAGGAT            | CGGGTACATTGGCTCCAG                |
| Gapdh<br>(NM_017008.4)             | glyceraldehyde-3-<br>phosphate<br>dehydrogenase    | AGAGAGAGGCCCTCAGTTGCT           | TGGAATTGTGAGGGAGATGCT             |
